# Supplementary material for: Smoking quantitatively increases risk for COVID-19
Source: PubMed Central journal article supplement — Eur Respir J. 2022 Dec 22;60(6):2101273. doi: 10.1183/13993003.01273-2021 (PMC8340618; doi:10.1183/13993003.01273-2021), 2022-12-22

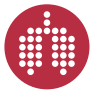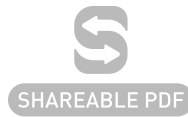

# Smoking quantitatively increases risk for COVID-19

Fuquan Zhang <sup>1</sup> and Ancha Baranova<sup>2,3</sup>

<sup>1</sup>Dept of Psychiatry, The Affiliated Brain Hospital of Nanjing Medical University, Nanjing, China. <sup>2</sup>School of Systems Biology, George Mason University, Manassas, VA, USA. <sup>3</sup>Research Center for Medical Genetics, Moscow, Russia.

Corresponding author: Fuquan Zhang ([zhangfq@njmu.edu.cn](mailto:zhangfq@njmu.edu.cn))

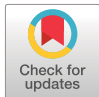

Shareable abstract (@ERSpublications)

**A one standard deviation increase in cigarettes smoked per day is associated with 2.5-fold increased risk for very severe COVID-19 and 2-fold increased risk for hospitalisation with COVID-19**  
<https://bit.ly/2UuVO1o>

**Cite this article as:** Zhang F, Baranova A. Smoking quantitatively increases risk for COVID-19. *Eur Respir J* 2022; 60: 2101273 [DOI: 10.1183/13993003.01273-2021].

This single-page version can be shared freely online.

Copyright ©The authors 2022.

This version is distributed under the terms of the Creative Commons Attribution Non-Commercial Licence 4.0. For commercial reproduction rights and permissions contact [permissions@ersnet.org](mailto:permissions@ersnet.org)

Received: 4 May 2021  
Accepted: 10 July 2021

*To the Editor:*

The coronavirus disease 2019 (COVID-19) pandemic has raised concern about the influence of smoking and alcohol drinking behaviour on the susceptibility to coronavirus infection and its severity. Widely debated, the connection remains highly controversial. Conclusions derived from observational studies commonly suffer from limited ability to discern causes and effects.

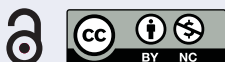

Supplement: ERJ-01273-2021.Shareable.pdf [file ERJ-01273-2021.Shareable.pdf]
